# Supplementary material for: Inherent characteristics of metachronous metastatic renal cell carcinoma in the era of targeted agents
Source: PubMed Central journal article supplement (PMC5668001; doi:10.18632/oncotarget.20230), 2017-08-12
Supplement: oncotarget-08-78825-s001.pdf [file oncotarget-08-78825-s001.pdf]

# Inherent characteristics of metachronous metastatic renal cell carcinoma in the Era of targeted agents

## SUPPLEMENTARY MATERIALS

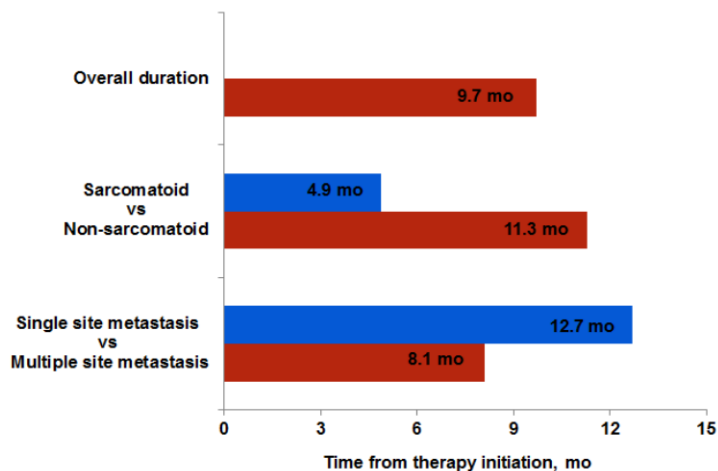

Supplementary Figure 1: Good and poor responders to initial targeted therapy agents and their median duration of use.

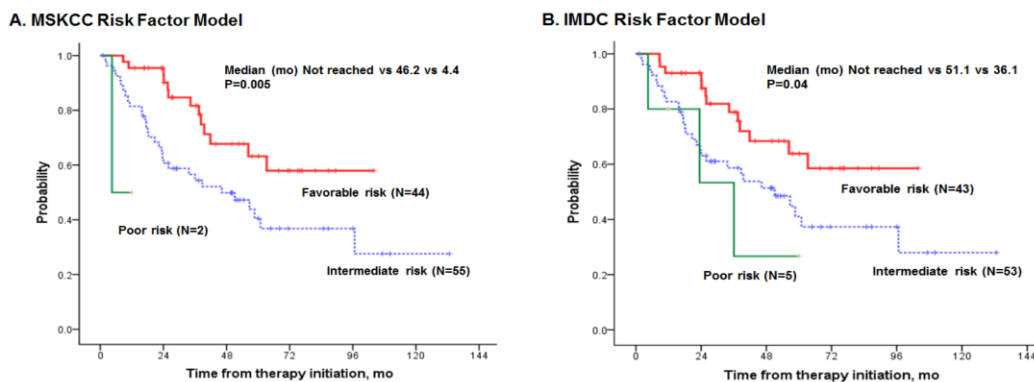

Supplementary Figure 2: Kaplan-Meier plots of overall survival determined by Memorial Sloan Kettering Cancer Center (MSKCC) (A) and International Metastatic Renal Cell Carcinoma Database Consortium (IMDC) (B).

**Supplementary Table 1: Analysis of factors associated with prediction of poor response (<9 months) in first-line TKI agents**

| Variables                                   | Univariate analysis |              |         | Multivariate analysis |              |         |
|---------------------------------------------|---------------------|--------------|---------|-----------------------|--------------|---------|
|                                             | OR                  | 95% CI       | P value | OR                    | 95% CI       | P value |
| Age: ≥60 years vs <60 years                 | 1.083               | 0.489–2.400  | 0.844   |                       |              |         |
| Sex: males vs females                       | 0.806               | 0.330–1.964  | 0.634   |                       |              |         |
| Size ≥4cm                                   | 1.850               | 0.538–6.361  | 0.329   |                       |              |         |
| T stage                                     |                     |              | 0.819   |                       |              |         |
| pT1 (reference)                             |                     |              |         |                       |              |         |
| pT2                                         | 0.808               | 0.250–2.612  | 0.721   |                       |              |         |
| pT3                                         | 1.138               | 0.455–2.846  | 0.782   |                       |              |         |
| Histological type: clear cell vs others     | 0.424               | 0.112–1.611  | 0.208   |                       |              |         |
| Sarcomatoid change                          | 7.030               | 1.409–35.078 | 0.017   | 8.355                 | 1.178–59.261 | 0.034   |
| Histologic necrosis                         | 0.711               | 0.167–3.019  | 0.643   |                       |              |         |
| Fuhrman grade: Grade 3–4 vs 1–2             | 1.922               | 0.767–4.813  | 0.163   |                       |              |         |
| Metastasectomy: done vs not done            | 0.607               | 0.242–1.520  | 0.286   |                       |              |         |
| Metastatic sites: single vs multiple        | 0.269               | 0.103–0.703  | 0.007   | 0.218                 | 0.063–0.752  | 0.016   |
| Time to metastasis: <1.5yr vs ≥1.5yr        | 2.357               | 1.036–5.362  | 0.041   | 0.535                 | 0.188–1.524  | 0.241   |
| First metastasis: Retroperitoneal space     | 2.903               | 0.962–8.759  | 0.059   |                       |              |         |
| First metastasis: Lung                      | 0.302               | 0.126–0.723  | 0.007   | 0.506                 | 0.162–1.583  | 0.241   |
| First metastasis: Liver                     | 1.487               | 0.201–11.006 | 0.698   |                       |              |         |
| First metastasis: bone                      | 3.394               | 0.948–12.146 | 0.060   |                       |              |         |
| First metastasis: Lymph node                | 0.350               | 0.038–3.250  | 0.356   |                       |              |         |
| ASA: 3–4 vs 1–2                             | 0.745               | 0.289–1.920  | 0.542   |                       |              |         |
| Hemoglobin (g/dL)                           | 0.760               | 0.599–0.965  | 0.024   | 0.866                 | 0.644–1.166  | 0.343   |
| LDH (IU/L)                                  | 1.012               | 0.993–1.033  | 0.221   |                       |              |         |
| Corrected calcium (mg/dL)                   | 3.236               | 1.074–9.756  | 0.037   | 2.248                 | 0.543–9.300  | 0.263   |
| eGFR (CKD-EPI) (ml/min/1.73m <sup>2</sup> ) | 0.987               | 0.963–1.011  | 0.291   |                       |              |         |

OR, odds ratio; CI, confidence interval; ASA, American Society of Anesthesiologists; LDH, lactate dehydrogenase; eGFR, estimated glomerular filtration rate; CKD-EPI, Chronic Kidney Disease Epidemiology Collaboration
